# Supplementary material
Source: PubMed Central journal article supplement (PMC2040266)
Supplement: NIHMS29104-supplement-01.pdf [file NIHMS29104-supplement-01.pdf]

Supplementary Table 1. List of all mutations of the *Ubx* locus surveyed for effects on leg trichome and bristle patterning.

| Tested Allele                                                          | Tester chromosome <sup>1</sup>                                                                                              |                                   |
|------------------------------------------------------------------------|-----------------------------------------------------------------------------------------------------------------------------|-----------------------------------|
|                                                                        | “Point mutation” <sup>ii</sup>                                                                                              | Deficiency                        |
| <i>abx</i> <sup>1</sup>                                                |                                                                                                                             | Df(3R)P2<br>Df(3R)109             |
| <i>abx</i> <sup>2</sup>                                                | <i>Ubx</i> <sup>1</sup><br><i>Ubx</i> <sup>9.22</sup>                                                                       |                                   |
|                                                                        |                                                                                                                             | Df(3R)P2<br>Df(3R)109             |
| <i>abx</i> <sup>CAC4</sup>                                             |                                                                                                                             | Df(3R)P2<br>Df(3R)109             |
| <i>abx</i> <sup>1</sup> <i>bx</i> <sup>3</sup> <i>pbx</i> <sup>1</sup> | <i>Ubx</i> <sup>1</sup><br><i>abx</i> <sup>1</sup> <i>bx</i> <sup>3</sup> <i>Ubx</i> <sup>61d</sup> <i>pbx</i> <sup>1</sup> |                                   |
|                                                                        |                                                                                                                             | Df(3R)P2<br>Df(3R)109             |
| <i>bx</i> <sup>1</sup>                                                 | homozygote                                                                                                                  |                                   |
|                                                                        |                                                                                                                             | Df(3R)P2<br>Df(3R)109             |
| <i>bx</i> <sup>3</sup>                                                 | <i>Ubx</i> <sup>1</sup><br><i>Ubx</i> <sup>9.22</sup><br>12.5<br><i>Ubx</i> <sup>849</sup>                                  |                                   |
|                                                                        |                                                                                                                             | Df(3R)P2<br>Df(3R)109<br>Df(3R)C1 |
| <i>bx</i> <sup>4</sup>                                                 |                                                                                                                             | Df(3R)P2<br>Df(3R)109             |
| <i>bx</i> <sup>8</sup>                                                 |                                                                                                                             | Df(3R)P2<br>Df(3R)109             |
| <i>bx</i> <sup>34e</sup>                                               | homozygote<br><i>Ubx</i> <sup>849</sup>                                                                                     |                                   |
|                                                                        |                                                                                                                             | Df(3R)P2<br>Df(3R)109             |
| <i>bx</i> <sup>83Ka</sup>                                              |                                                                                                                             | Df(3R)P2<br>Df(3R)109             |
| <i>bx</i> <sup>83kb</sup>                                              |                                                                                                                             | Df(3R)P2<br>Df(3R)109             |
| <i>bx</i> <sup>d1</sup>                                                | <i>Ubx</i> <sup>1</sup><br><i>Ubx</i> <sup>6.28</sup>                                                                       |                                   |

|                                   |                            |                                    |
|-----------------------------------|----------------------------|------------------------------------|
|                                   |                            | Df(3R)C1                           |
|                                   |                            | Df(3R)P2                           |
| <i>bxd</i> <sup>31j</sup>         |                            | Df(3R)P2                           |
|                                   |                            | Df(3R)109                          |
| <i>bxd</i> <sup>68</sup>          |                            | Df(3R)P2                           |
|                                   |                            | Df(3R)109                          |
| <i>Df(3R) bxd</i> <sup>100</sup>  | <i>Ubx</i> <sup>1</sup>    |                                    |
|                                   | <i>Ubx</i> <sup>195</sup>  |                                    |
|                                   | <i>Ubx</i> <sup>849</sup>  |                                    |
|                                   | <i>Ubx</i> <sup>9.22</sup> |                                    |
|                                   |                            | Df(3R)P2                           |
| <i>T(3;4) bxd</i> <sup>101</sup>  |                            | Df(3R)P2                           |
|                                   |                            | Df(3R)109                          |
| <i>In(3LR) bxd</i> <sup>106</sup> |                            | Df(3R)P2                           |
|                                   |                            | Df(3R)109                          |
| <i>Tp(3;1) bxd</i> <sup>111</sup> |                            | Df(3R)P2                           |
|                                   |                            | Df(3R)109                          |
| <i>In(3LR) bxd</i> <sup>113</sup> |                            | Df(3R)P2                           |
|                                   |                            | Df(3R)109                          |
| <i>In(3LR) bxd</i> <sup>194</sup> |                            | Df(3R)P2                           |
|                                   |                            | Df(3R)109                          |
| <i>bxd</i> <sup>266</sup>         | homozygote                 |                                    |
|                                   |                            | Df(3R)P2                           |
|                                   |                            | Df(3R)109                          |
| <i>bxd</i> <sup>HIM</sup>         | <i>Ubx</i> <sup>1</sup>    |                                    |
|                                   |                            | Df(3R)P2                           |
| <i>Cbx</i> <sup>1</sup>           | homozygote                 |                                    |
| <i>Cbx</i> <sup>3</sup>           | homozygote                 |                                    |
|                                   | <i>Ubx</i> <sup>1</sup>    |                                    |
|                                   | <i>Cbx</i> <sup>1</sup>    |                                    |
|                                   |                            | Df(3R)P2                           |
|                                   |                            | Df(3R)109                          |
|                                   |                            | Df(3R)P9                           |
|                                   |                            | Df(3R)C1                           |
|                                   |                            | Df(3R)50-1                         |
|                                   |                            | Df(3R)I3B                          |
|                                   |                            | Df(3R)P2                           |
|                                   |                            | Df(3R)109                          |
|                                   |                            | Df(3R) <i>Ubx</i> <sup>132B1</sup> |
|                                   |                            | Df(3R) <i>Ubx</i> <sup>82B1</sup>  |
| <i>Cbx</i> <sup>Twt</sup>         |                            | Df(3R)P2                           |
|                                   |                            | Df(3R)109                          |

|                                         |                           |           |
|-----------------------------------------|---------------------------|-----------|
|                                         |                           | Df(3R)P2  |
|                                         |                           | Df(3R)109 |
| <i>Df(3)Ubx<sup>HC71-1/HC166D</sup></i> | homozygote                |           |
| <i>Df(3)Ubx<sup>71-1/HC16-1</sup></i>   | homozygote                |           |
| <i>pbx<sup>1</sup></i>                  | <i>Ubx<sup>1</sup></i>    |           |
|                                         | <i>Ubx<sup>9,22</sup></i> |           |
|                                         |                           | Df(3R)C1  |
|                                         |                           | Df(3R)P2  |
|                                         |                           | Df(3R)109 |
| <i>pbx<sup>2</sup></i>                  | homozygote                |           |
|                                         | <i>Ubx<sup>1</sup></i>    |           |
|                                         | <i>Ubx<sup>6,28</sup></i> |           |
|                                         | <i>Ubx<sup>849</sup></i>  |           |
|                                         |                           | Df(3R)P2  |

<sup>i</sup> Tested allele was placed in *trans* to the indicated mutation on the tester chromosome.

<sup>ii</sup> *Ubx* “point” mutations include transposable element insertions and small deletions that disrupt the transcript to produce a non-functional protein.
